# Supplementary material
Source: publisher site journal article supplement (https://www.dovepress.com/article/517281)
Supplement: Supplementary file 1 [file 517281%20Revised%20Supplementary%20Tables%201-3.docx]

***Supplementary, Online-Only Materials***

**Temporal Relationship Between Treatment Burden and Self-Care and Its Impact on Systolic Blood Pressure and Hypertension Control**

*International Journal of General Medicine*; 2025

**Supplementary Table 1 Cross-lagged panel model of the relationship between treatment burden and self-care among study participants using** **leave-one-out analysis**

| **Path coefficients** | ***β* (95% confidence interval)** | ***P* value** |
| --- | --- | --- |
| Full model | | |
| *β*1 | -0.028 (-0.076, 0.020) | 0.257 |
| *β*2 | -0.089 (-0.138, -0.040) | <0.001 |
| *r*1 | -0.180 (-0.229, -0.130) | <0.001 |
| *r*2 | 0.216 (0.166, 0.266) | <0.001 |
| *r*3 | 0.159 (0.111, 0.207) | <0.001 |
| Model excluding nonsmoking | | |
| *β*1 | -0.026 (-0.075, 0.014) | 0.288 |
| *β*2 | -0.089 (-0.139, -0.047) | <0.001 |
| *r*1 | -0.188 (-0.237, -0.138) | <0.001 |
| *r*2 | 0.159 (0.111, 0.199) | <0.001 |
| *r*3 | 0.139 (0.088, 0.189) | <0.001 |
| Model excluding nondrinking | | |
| *β*1 | -0.024 (-0.072, 0.025) | 0.336 |
| *β*2 | -0.078 (-0.128, -0.036) | 0.002 |
| *r*1 | -0.202 (-0.251, -0.160) | <0.001 |
| *r*2 | 0.179 (0.128, 0.229) | <0.001 |
| *r*3 | 0.159 (0.111, 0.207) | <0.001 |
| Model excluding physical activity | | |
| *β*1 | -0.001 (-0.049, 0.047) | 0.957 |
| *β*2 | -0.111 (-0.160, -0.062) | <0.001 |
| *r*1 | -0.158 (-0.208, -0.117) | <0.001 |
| *r*2 | 0.218 (0.168, 0.267) | <0.001 |
| *r*3 | 0.164 (0.116, 0.212) | <0.001 |
| Model excluding healthy diet | | |
| *β*1 | -0.001 (-0.047, 0.045) | 0.966 |
| *β*2 | -0.068 (-0.117, -0.019) | 0.004 |
| *r*1 | -0.203 (-0.252, -0.153) | <0.001 |
| *r*2 | 0.249 (0.198, 0.300) | <0.001 |
| *r*3 | 0.149 (0.101, 0.198) | <0.001 |
| Model excluding medication adherence | | |
| *β*1 | -0.001 (-0.048, 0.046) | 0.968 |
| *β*2 | -0.073 (-0.118, -0.035) | 0.002 |
| *r*1 | -0.053 (-0.101, -0.013) | 0.030 |
| *r*2 | 0.289 (0.244, 0.334) | <0.001 |
| *r*3 | 0.163 (0.116, 0.211) | <0.001 |

Note: *β*1, *β*2 = cross-lagged path coefficients; *r*1 = synchronous correlations; *r*2, *r*3 = auto-correlations

All models adjusted for age, sex, and presence of diabetes comorbidity.

**Supplementary Table 2 Mediation effect of self-care on the relationship between treatment burden and systolic blood pressure using** **leave-one-out analysis**

| **Path coefficients** | ***β* (95% confidence interval)** | ***P* value** |
| --- | --- | --- |
| Full model | | |
| Indirect effect 1 | -0.010 (-0.014, -0.007) | <0.001 |
| Indirect effect 2 | -2.294 (-3.043, -1.545) | <0.001 |
| Direct effect | 0.202 (0.150, 0.251) | <0.001 |
| Indirect effect | 0.024 (0.012, 0.040) | <0.001 |
| Total effect | 0.226 (0.171, 0.274) | <0.001 |
| Mediation proportion | 10.7% (5.3%, 17.5%) | <0.001 |
| Model excluding nonsmoking | | |
| Indirect effect 1 | -0.009 (-0.012, -0.005) | <0.001 |
| Indirect effect 2 | -1.989 (-2.812, -1.166) | <0.001 |
| Direct effect | 0.209 (0.156, 0.258) | <0.001 |
| Indirect effect | 0.017 (0.008, 0.030) | <0.001 |
| Total effect | 0.226 (0.171, 0.274) | <0.001 |
| Mediation proportion | 7.8% (3.4%, 14.3%) | 0.003 |
| Model excluding nondrinking | | |
| Indirect effect 1 | -0.008 (-0.012, -0.005) | <0.001 |
| Indirect effect 2 | -2.044 (-2.879, -1.209) | <0.001 |
| Direct effect | 0.209 (0.157, 0.257) | <0.001 |
| Indirect effect | 0.017 (0.007, 0.030) | 0.002 |
| Total effect | 0.226 (0.171, 0.274) | <0.001 |
| Mediation proportion | 7.5% (3.2%, 13.5%) | 0.003 |
| Model excluding physical activity | | |
| Indirect effect 1 | -0.009 (-0.013, -0.006) | <0.001 |
| Indirect effect 2 | -2.025 (-2.760, -1.289) | <0.001 |
| Direct effect | 0.194 (0.145, 0.244) | <0.001 |
| Indirect effect | 0.019 (0.010, 0.033) | <0.001 |
| Total effect | 0.213 (0.165, 0.266) | <0.001 |
| Mediation proportion | 8.9% (4.8%, 15.5%) | 0.002 |
| Model excluding healthy diet | | |
| Indirect effect 1 | -0.008 (-0.011, -0.004) | <0.001 |
| Indirect effect 2 | -2.631 (-3.454, -1.808) | <0.001 |
| Direct effect | 0.206 (0.153, 0.253) | <0.001 |
| Indirect effect | 0.020 (0.009, 0.339) | 0.002 |
| Total effect | 0.226 (0.172, 0.274) | <0.001 |
| Mediation proportion | 8.8% (3.7%, 14.9%) | 0.003 |
| Model excluding medication adherence | | |
| Indirect effect 1 | -0.007 (-0.010, -0.003) | <0.001 |
| Indirect effect 2 | -1.972 (-2.848, -1.096) | <0.001 |
| Direct effect | 0.171 (0.115, 0.219) | <0.001 |
| Indirect effect | 0.013 (0.005, 0.024) | 0.006 |
| Total effect | 0.184 (0.128, 0.233) | <0.001 |
| Mediation proportion | 7.0% (2.8%, 13.0%) | 0.011 |

Note: β = path coefficients; Mediation proportion = (Indirect effect /Total effect) × 100%

All models adjusted for age, sex, and presence of diabetes comorbidity.

**Supplementary Table 3 Mediation effect of self-care on the relationship between treatment burden and hypertension control using** **leave-one-out analysis**

| **Path coefficients** | ***β* (95% confidence interval)** | ***P* value** |
| --- | --- | --- |
| Full model | | |
| Indirect effect 1 | -0.011 (-0.014, -0.007) | <0.001 |
| Indirect effect 2 | 0.106 (0.080, 0.130) | <0.001 |
| Direct effect | -0.008 (-0.010, -0.006) | <0.001 |
| Indirect effect | -0.001 (-0.002, -0.001) | <0.001 |
| Total effect | -0.009 (-0.011, -0.007) | <0.001 |
| Mediation proportion | 11.1% (6.5%, 18.0%) | <0.001 |
| Model excluding nonsmoking | | |
| Indirect effect 1 | -0.009 (-0.012, -0.005) | <0.001 |
| Indirect effect 2 | 0.102 (0.074, 0.129) | <0.001 |
| Direct effect | -0.008 (-0.010, -0.007) | <0.001 |
| Indirect effect | -0.001 (-0.001, -0.001) | <0.001 |
| Total effect | -0.009 (-0.011, -0.007) | <0.001 |
| Mediation proportion | 9.8% (5.0%, 16.0%) | <0.001 |
| Model excluding nondrinking | | |
| Indirect effect 1 | -0.008 (-0.010, -0.007) | <0.001 |
| Indirect effect 2 | 0.098 (0.069, 0.126) | <0.001 |
| Direct effect | -0.008 (-0.010, -0.007) | <0.001 |
| Indirect effect | -0.001 (-0.001, -0.001) | <0.001 |
| Total effect | -0.009 (-0.011, -0.007) | <0.001 |
| Mediation proportion | 8.8% (4.6%, 14.8%) | <0.001 |
| Model excluding physical activity | | |
| Indirect effect 1 | -0.009 (-0.013, -0.006) | <0.001 |
| Indirect effect 2 | 0.085 (0.061, 0.110) | <0.001 |
| Direct effect | -0.008 (-0.010, -0.006) | <0.001 |
| Indirect effect | -0.001 (-0.001, -0.001) | <0.001 |
| Total effect | -0.008 (-0.011, -0.007) | <0.001 |
| Mediation proportion | 8.9% (5.1%, 14.7%) | <0.001 |
| Model excluding healthy diet | | |
| Indirect effect 1 | -0.008 (-0.010, -0.007) | <0.001 |
| Indirect effect 2 | 0.115 (0.087, 0.143) | <0.001 |
| Direct effect | -0.008 (-0.010, -0.007) | <0.001 |
| Indirect effect | -0.001 (-0.001, -0.001) | <0.001 |
| Total effect | -0.009 (-0.011, -0.007) | <0.001 |
| Mediation proportion | 9.5% (4.2%, 15.2%) | <0.001 |
| Model excluding medication adherence | | |
| Indirect effect 1 | -0.007 (-0.009, -0.006) | <0.001 |
| Indirect effect 2 | 0.091 (0.061, 0.119) | <0.001 |
| Direct effect | -0.007 (-0.009, -0.006) | <0.001 |
| Indirect effect | -0.001 (-0.001, -0.001) | 0.001 |
| Total effect | -0.008 (-0.010, -0.006) | <0.001 |
| Mediation proportion | 7.3% (3.3%, 12.5%) | 0.002 |

Note: β = path coefficients; Mediation proportion = (Indirect effect /Total effect) × 100%

All models adjusted for age, sex, and presence of diabetes comorbidity.
